# Supplementary material for: Assessing the effects of aging on the liver endothelial cell landscape using single-cell RNA sequencing
Source: PubMed Central journal article supplement — Hepatol Commun. 2023 Feb 1;7(2):e0021. doi: 10.1097/HC9.0000000000000021 (PMC9894352; doi:10.1097/hc9.0000000000000021), 2023-02-01
Supplement: hc9-7-e0021-s001.pdf [file hc9-7-e0021-s001.pdf]

A

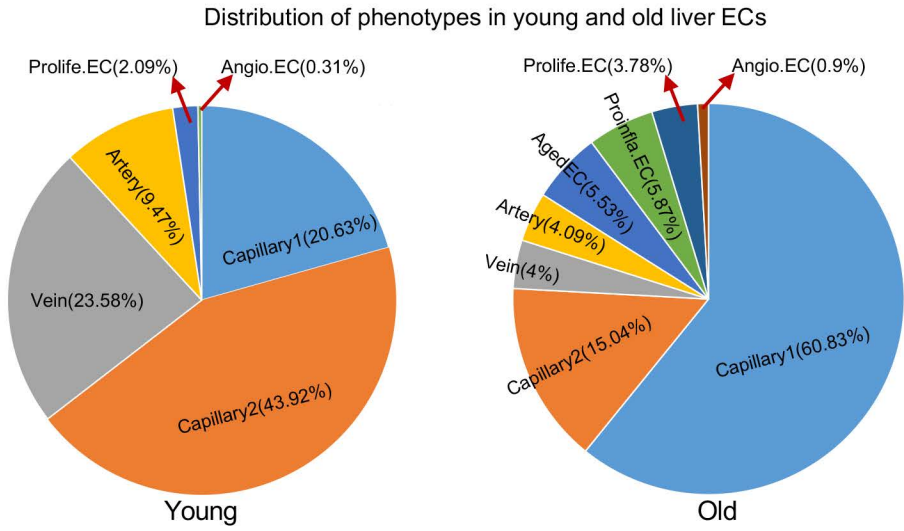

B

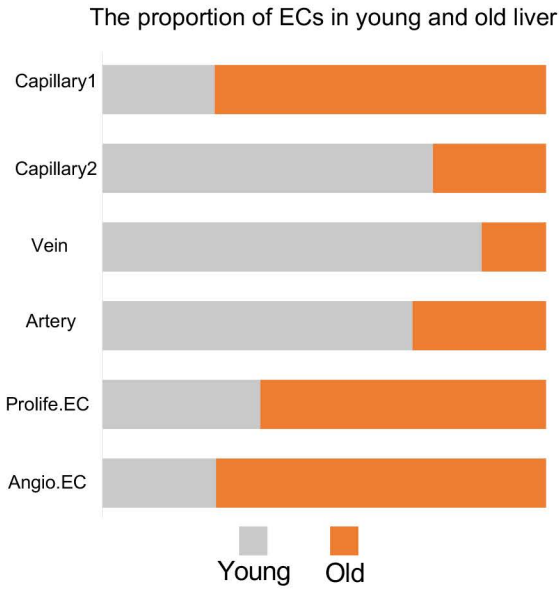

C

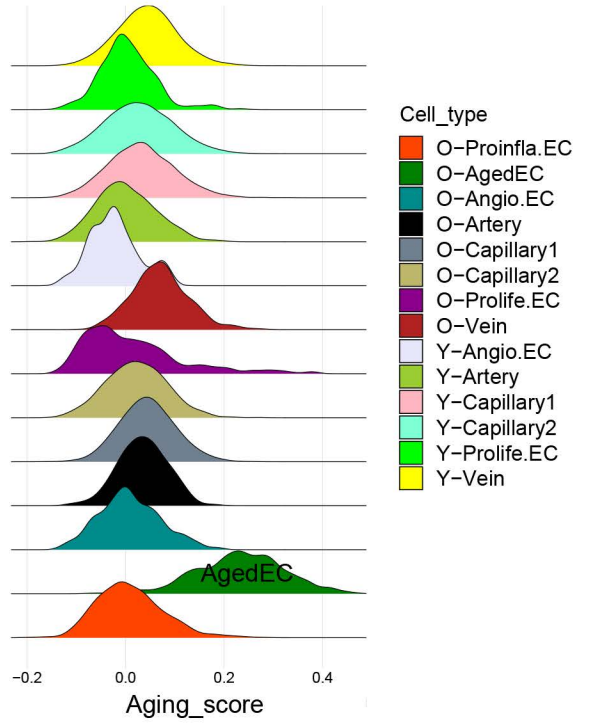

Figure S1

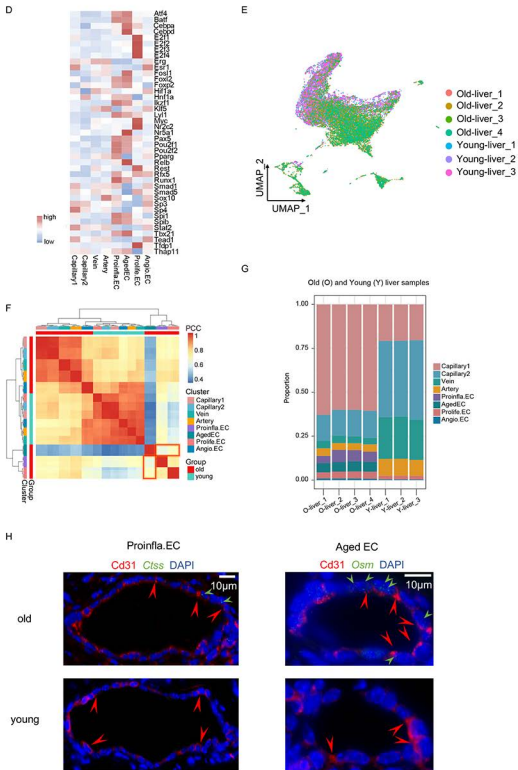

Figure S1

I

## The position of Aged ECs

Old liver

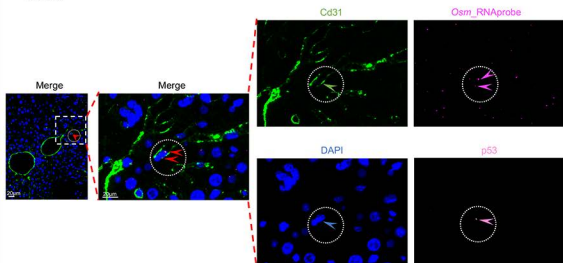

Young liver (blank control)

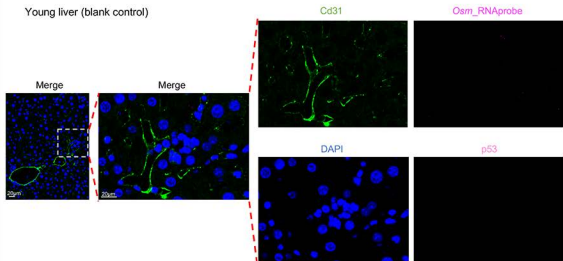

Figure S1

**Figure S1. Relative composition of EC phenotypes and gene set scores of senescence-associated secretory phenotype (SASP) in young and old mouse liver.**

- (A) Pie charts showing the relative composition of EC phenotypes in young and old mouse liver ECs.
- (B) Phenotypic distribution of young and old common EC clusters in the liver.
- (C) Density plot showing gene set scores of SASP genes in ECs of the mouse liver in the young (denoted by "Y") and old (denoted by "O") group.
- (D) Heatmap showing the cell-type specific TF activity of mouse liver ECs.
- (E) UMAP plot showing the integration of the seven liver ECs datasets with harmony.
- (F) Hierarchical heatmap showing the PCC (Pearson correlation coefficient) of a normalized transcriptome between groups in cell type resolution. The color intensity of the heatmap suggests the PCC values. Hierarchical clustering analysis was performed on the basis of the PCC of the relative change in mean expression of highly variable genes. The color bars above the heatmap indicate the cell type and group comprised by all young and old samples. The red boxes, in the heatmap, indicated that Aged EC, Prolife.EC and Proinfla.EC had high correlations.
- (G) Composition of the ratios of samples in the young liver (denoted by "Y-liver") and old liver (denoted by "O-liver") group.
- (H) RNAscope experiments confirmed the expression of marker genes (*Ctss*, *Osm*) in Proinfla.EC and Aged EC. Micrographs of *Osm* (indicated by green arrowheads) and *Ctss* (indicated by green arrowheads) mRNA transcripts in old liver sections. Immunostaining for Cd31 was used to visualize ECs (indicated by red arrowheads). Nuclei were counterstained with DAPI. Images show the red-, green- and blue-channel images. Green arrowheads indicate *Osm* or *Ctss* RNAscope signals, respectively. Scale bars, 10  $\mu$ m.
- (I) RNAscope experiments and immunofluorescence staining confirmed *Osm* transcripts/p53 (the marker of senescent cells) /Cd31 coimmunostaining for Aged EC in liver sinusoidal region from old and young mice. Scale bar, 20  $\mu$ m.
