# Supplementary material for: Assessing the effects of aging on the liver endothelial cell landscape using single-cell RNA sequencing
Source: PubMed Central journal article supplement — Hepatol Commun. 2023 Feb 1;7(2):e0021. doi: 10.1097/HC9.0000000000000021 (PMC9894352; doi:10.1097/hc9.0000000000000021), 2023-02-01
Supplement: hc9-7-e0021-s002.pdf [file hc9-7-e0021-s002.pdf]

A

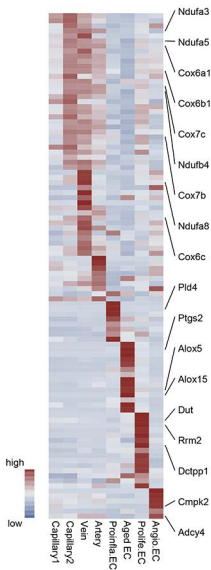

B

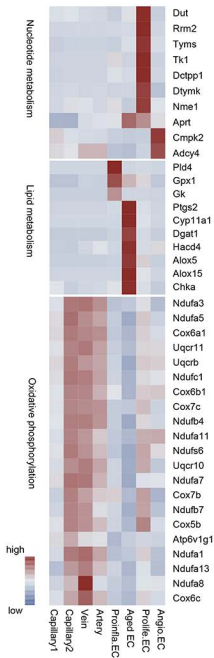

**Figure S2. The metabolic heterogeneity of different ECs.**

- (A) Heatmap showing the mean expression of the metabolic genes in different ECs. Color scale: red, high expression; blue, low expression.
- (B) Vascular-Bed specific EC expression heatmaps of representative metabolic genes involved in Nucleotide metabolism, lipid metabolism, and Oxidative phosphorylation metabolism. Color scale: red, high expression; blue, low expression.
