# Supplementary material for: Assessing the effects of aging on the liver endothelial cell landscape using single-cell RNA sequencing
Source: PubMed Central journal article supplement — Hepatol Commun. 2023 Feb 1;7(2):e0021. doi: 10.1097/HC9.0000000000000021 (PMC9894352; doi:10.1097/hc9.0000000000000021), 2023-02-01

**Figure S3. Pseudo-time trajectory of old liver ECs phenotypes.**

- (A) Pseudo-time analysis of liver ECs in the old. The points are colored by cell types.
- (B) Gene expression dynamics of representative marker genes enriched in the different EC phenotypes along the artery-capillary-vein axis.
- (C) GO analysis of class A DEGs in 4 clusters, indicating the earliest transcriptomic events during aging.

A

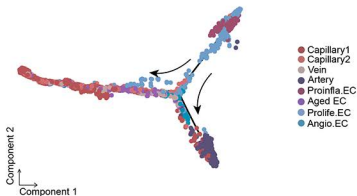

B

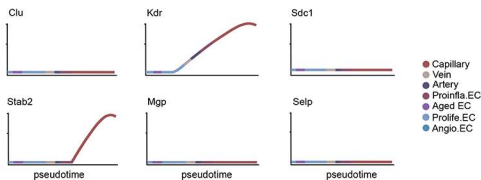

C

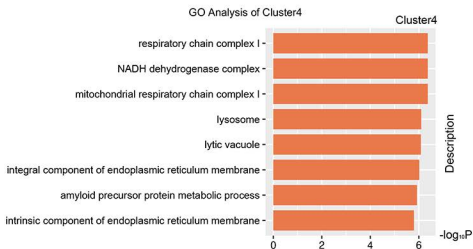

Supplement: hc9-7-e0021-s003.pdf [file hc9-7-e0021-s003.pdf]
