# Supplementary material for: Assessing the effects of aging on the liver endothelial cell landscape using single-cell RNA sequencing
Source: PubMed Central journal article supplement — Hepatol Commun. 2023 Feb 1;7(2):e0021. doi: 10.1097/HC9.0000000000000021 (PMC9894352; doi:10.1097/hc9.0000000000000021), 2023-02-01
Supplement: hc9-7-e0021-s004.pdf [file hc9-7-e0021-s004.pdf]

**Figure S4. CellPhoneDB analysis of cell-cell interaction in young and old hepatic vascular niche.**

- (A) Cell-cell interaction analysis between Aged EC and other ECs in the old hepatic vascular niche. Ligand–receptor pairs are labeled in x-axis. P values are indicated by the circle sizes while different colors represent different expression levels of ligands and receptors. We carried out the mRNA assay to extrapolate protein interactions.
- (B) Up-regulated cell-cell interaction between Hepatocyte and indicated ECs in old hepatic vascular niche. Ligand–receptor pairs are labeled in x-axis. P values are indicated by the circle sizes while different colors represent different expression levels of ligands and receptors. We carried out the mRNA assay to extrapolate protein interactions.
- (C) Cell-cell interaction analysis between Proinfla.EC and indicated ECs in the old hepatic vascular niche. Ligand–receptor pairs are labeled in x-axis. P values are indicated by the circle sizes while different colors represent different expression levels of ligands and receptors. We carried out the mRNA assay to extrapolate protein interactions.
- (D) Up-regulated cell-cell interaction between Capillary1 and indicated ECs in old hepatic vascular niche. Ligand–receptor pairs are labeled in x-axis. P values are indicated by the circle sizes while different colors represent different expression levels of ligands and receptors. We carried out the mRNA assay to extrapolate protein interactions.
- (E) Up-regulated cell-cell interaction between Capillary2 and indicated ECs in old hepatic vascular niche. Ligand–receptor pairs are labeled in x-axis. P values are indicated by the circle sizes while different colors represent different expression levels of ligands and receptors. We carried out the mRNA assay to extrapolate protein interactions.
- (F) Up-regulated cell-cell interaction between Vein and indicated ECs in old hepatic vascular niche. Ligand–receptor pairs are labeled in x-axis. P values are indicated by the circle sizes while different colors represent different expression levels of ligands and receptors. We carried out the mRNA assay to extrapolate protein interactions.
- (G) Up-regulated cell-cell interaction between Artery and indicated ECs in old hepatic vascular niche. Ligand–receptor pairs are labeled in x-axis. P values are indicated by the circle sizes while different colors represent different expression levels of ligands and receptors. We carried out the mRNA assay to extrapolate protein interactions.
- (H) Up-regulated cell-cell interaction between Prolife.EC and indicated ECs in old hepatic vascular niche. Ligand–receptor pairs are labeled in x-axis. P values are indicated by the circle sizes while different colors represent different expression levels of ligands and receptors. We carried out the mRNA assay to extrapolate protein interactions.
- (I) Up-regulated cell-cell interaction between Angio.EC and indicated ECs in old hepatic vascular niche. Ligand–receptor pairs are labeled in x-axis. P values are indicated by the circle sizes while different colors represent different expression levels of ligands and receptors. We carried out the mRNA assay to extrapolate protein interactions.
